# Supplementary material for: Obesity Outweighs Protection Conferred by Adjuvanted Influenza Vaccination
Source: PubMed Central journal article supplement (PMC4981723; doi:10.1128/mbio.01144-16), 2016-08-02
Supplement: mbo004162929sf1.pdf [file mbo004162929sf1.pdf]

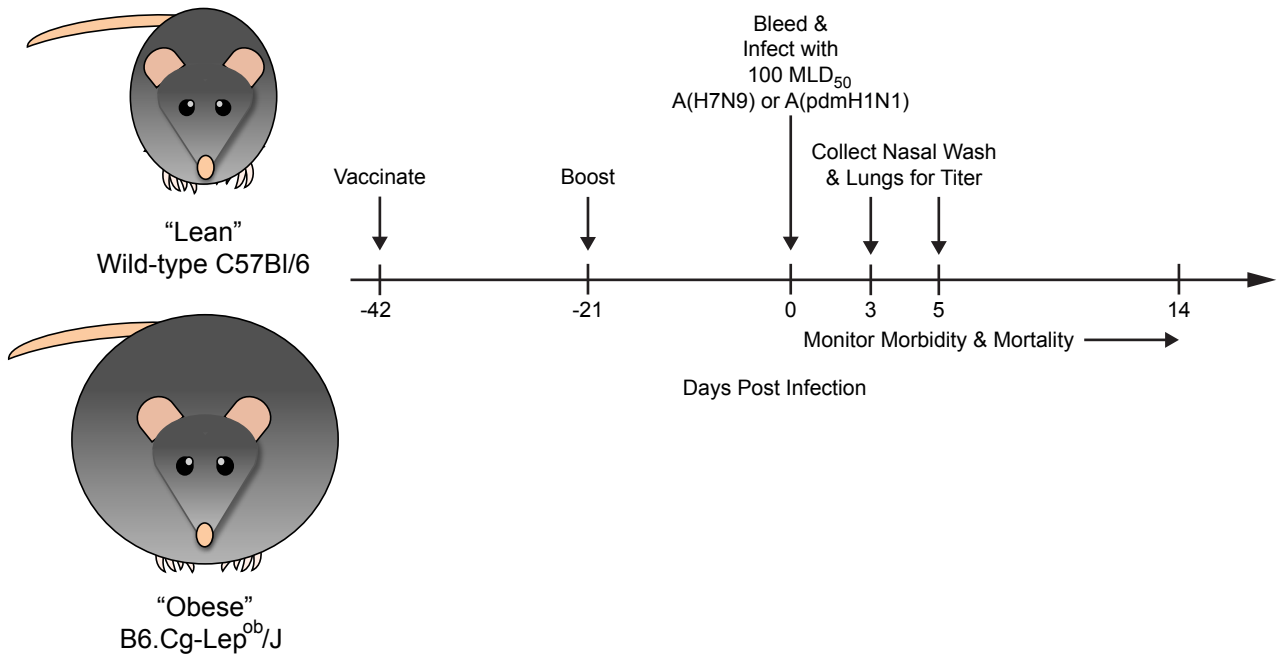

**Supplementary Figure S1: Experimental setup.** Six week-old C57Bl/6 (lean) and B6.Cg-Lepob/J (obese) mice were bled for baseline sera, lightly anesthetized with isoflurane and then vaccinated (n=10-11/group) with PBS, or H7N9 vaccine with or without adjuvant. Three weeks following initial vaccination, mice were bled then boosted with a second dose of vaccine or vaccine plus adjuvant. Three weeks post boost, animals were lightly anesthetized with isoflurane, bled then inoculated intranasally with PBS or 100x MLD50 of A/Anhui/1/2013 (H7N9). Mice were monitored daily for clinical signs of infection and weighed every 24 hpi.
