# Supplementary material for: Obesity Outweighs Protection Conferred by Adjuvanted Influenza Vaccination
Source: PubMed Central journal article supplement (PMC4981723; doi:10.1128/mbio.01144-16), 2016-08-02
Supplement: mbo004162929sf2.pdf [file mbo004162929sf2.pdf]

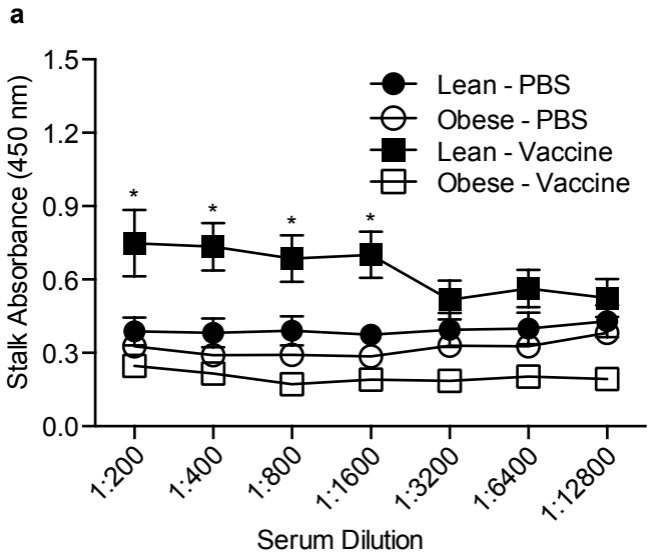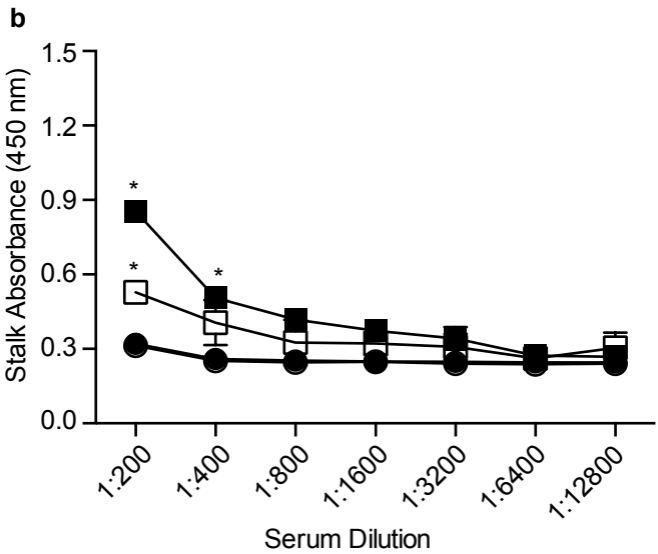

**Supplementary Figure S2: Stalk antibody response following vaccination alone.** Groups of lean (solid) or obese (open) mice (n = 10-11/type/group) were vaccinated with PBS (circles), vaccine alone (squares). Three weeks post vaccination, mice were boosted and serum was collected 3 weeks post boost. Post-boost serum was analyzed for stalk antibody against influenza A/Anhui/1/2013 (H7N9) (A) and influenza A/California/04/2009 (pdmH1N1) (B). Data are presented as mean absorbance  $\pm$  standard error. Statistical significance was determined using ANOVA with vaccine strategy and mouse type as main effects. Tukey's was used for post-hoc comparison. Differences were considered significant at  $p < 0.05$ . \* $p < 0.05$ .
