# Supplementary material for: Obesity Outweighs Protection Conferred by Adjuvanted Influenza Vaccination
Source: PubMed Central journal article supplement (PMC4981723; doi:10.1128/mbio.01144-16), 2016-08-02
Supplement: mbo004162929sf3.pdf [file mbo004162929sf3.pdf]

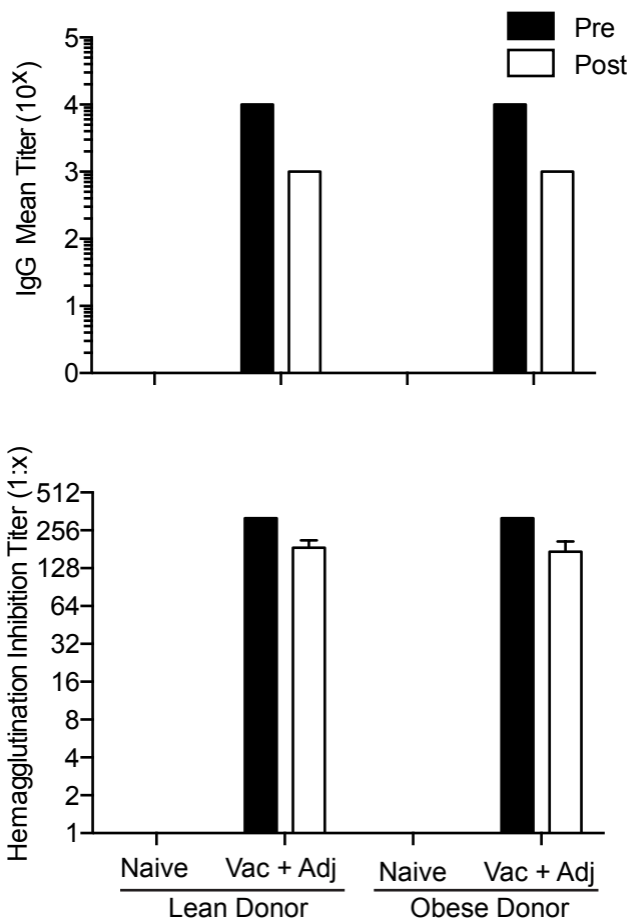

**Supplemental Figure S3: Serology in obese mice pre and post-passive serum transfer.** 8 week old, obese mice (n = 3/group) were given a passive transfer of either naïve or adjuvanted vaccine lean or obese sera intraperitoneally. Serum IgG (A) and hemagglutination inhibitor (B) titers were measured before (black) and following (white) transfer.
